# Supplementary material
Source: publisher figshare collection journal article supplement (https://asha.figshare.com/articles/dataset/_/28514249)
Supplement: Supplementary file 1 [file 1]

## Supplemental Material S2. Post-yoga questionnaire.

| Questions                                          | Participant responses                                                                                                                                                                                | Participant comments                                                                                                                                                                                          |
|----------------------------------------------------|------------------------------------------------------------------------------------------------------------------------------------------------------------------------------------------------------|---------------------------------------------------------------------------------------------------------------------------------------------------------------------------------------------------------------|
| Would you change the length of the yoga class?     | A little shorter ( $n = 1$ )<br>No change ( $n = 12$ )                                                                                                                                               |                                                                                                                                                                                                               |
| Would you change the level of physical challenge?  | No change ( $n = 6$ )<br>A little harder ( $n = 6$ )<br>Much harder ( $n = 1$ )                                                                                                                      | “... have standing options. Have separate classes for [people with hemiparesis].” PWA13                                                                                                                       |
| Would you change the amount of social time?        | A little less ( $n = 1$ )<br>No change ( $n = 9$ )<br>A little more ( $n = 2$ )<br>Much more ( $n = 1$ )                                                                                             | “Social is ok but would like longer time practicing yoga.” PWA13                                                                                                                                              |
| Would you change the yoga therapist’s speech rate? | A little slower ( $n = 2$ )<br>No change ( $n = 10$ )<br>A little faster ( $n = 1$ )                                                                                                                 |                                                                                                                                                                                                               |
| Would you change the homework option?              | No homework ( $n = 1$ )<br>A little less ( $n = 1$ )<br>No change ( $n = 8$ )<br>A little more ( $n = 3$ )                                                                                           |                                                                                                                                                                                                               |
| Were the yoga prompts helpful?                     | I feel neutral ( $n = 3$ )<br>A little helpful ( $n = 4$ )<br>Very helpful ( $n = 6$ )                                                                                                               | “Had a better time when instructor went off of the PowerPoint (e.g., no prompt).” PWA2 – used iPad<br><br>“Spouse indicated that she a hard time with prompts and camera shown at same time” PWA8 – used iPad |
| What did you like best about yoga?                 | <b>All of it (<math>n = 5</math>)</b><br>Breathwork ( $n = 5$ )<br>Mediation ( $n = 2$ )<br>Postures ( $n = 1$ )<br>Visualization ( $n = 1$ )<br>Affirmations ( $n = 0$ )<br>Social Time ( $n = 1$ ) | “Calming and breathing works most.” PWA14<br><br>“Allow time to practice saying affirmations [during the practice].” PWA2<br><br>“Like [practicing] with other people, not on my own” PWA5                    |
| What will you continue to practice?                | <b>All of it (<math>n = 5</math>)</b><br>Breathwork ( $n = 6$ )<br>Mediation ( $n = 2$ )<br>Postures ( $n = 4$ )<br>Visualization ( $n = 2$ )<br>Affirmations ( $n = 1$ )                            | “... breathwork and meditation before bed to help sleep!” PWA5                                                                                                                                                |
| Would you like more yoga classes?                  | Yes ( $n = 13$ )<br>No ( $n = 0$ )                                                                                                                                                                   |                                                                                                                                                                                                               |
| <b>Other Comments</b>                              |                                                                                                                                                                                                      | “Class was wonderful and enjoyed practicing.” PWA10<br><br>“Best ever” PWA12<br><br>“Meditate [when stressed]” PWA12                                                                                          |
