# Supplementary material
Source: publisher figshare collection journal article supplement (https://asha.figshare.com/articles/dataset/_/28514249)

**Supplemental Material S1.** Example of yoga prompt on PowerPoint.

Cat 

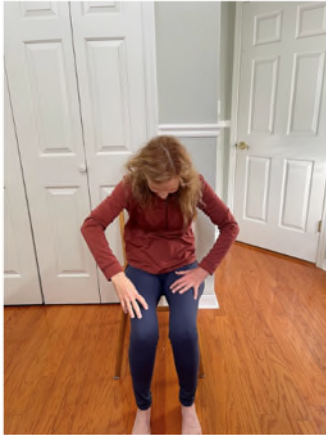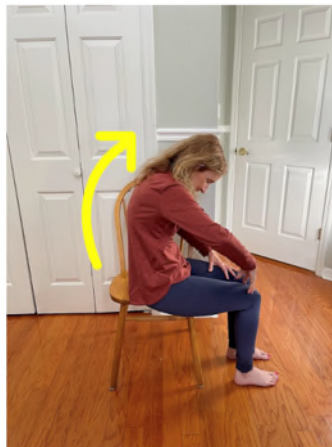

- Round the Back

- Look Down

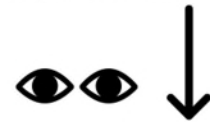

Supplement: Supplementary file 2 [file 1]
